# Supplementary material for: Disentangling the Association between ADHD and Alcohol Use Disorder in Individuals Suffering from Bipolar Disorder: A Systematic Review and Meta-Analysis
Source: MDPI journal article supplement (doi:10.3390/brainsci12010038), 2021-12-28
Supplement: s1 [file s1]

**Table S1. Quality assessment of included studies****a)**

| <b>Study</b>              | <b>Age comparability<sup>a</sup></b> | <b>Gender comparability<sup>b</sup></b> | <b>ADHD diagnosis<sup>c</sup></b> | <b>AUD diagnosis<sup>d</sup></b> | <b>Mood phase<sup>e</sup></b> |
|---------------------------|--------------------------------------|-----------------------------------------|-----------------------------------|----------------------------------|-------------------------------|
| Jhanda et al., 2018       | +                                    | -                                       | +                                 | ?                                | +                             |
| Karahmet et al., 2013     | -                                    | -                                       | +                                 | ?                                | +                             |
| Koc and Kesebir, 2014     | -                                    | -                                       | +                                 | ?                                | +                             |
| McIntyre et al., 2010     | +                                    | -                                       | +                                 | +                                | ?                             |
| Nierenberg et al., 2005   | +                                    | -                                       | +                                 | +                                | -                             |
| Pattanshetti et al., 2016 | ?                                    | ?                                       | +                                 | -                                | +                             |
| Perroud et al., 2014      | -                                    | +                                       | +                                 | +                                | -                             |
| Perugi et al., 2013       | -                                    | +                                       | +                                 | +                                | -                             |
| Pinna et al., 2019        | -                                    | -                                       | +                                 | -                                | ?                             |
| Tamam et al., 2008        | +                                    | +                                       | +                                 | +                                | +                             |
| Torres et al., 2015       | -                                    | -                                       | +                                 | +                                | +                             |

ADHD = Attention Deficit Hyperactivity Disorder; AUD = Alcohol Use Disorder; <sup>a</sup> difference in mean age  $\leq 3$  years = +; difference in mean age  $> 3$  years = -; Unclear = ?; <sup>b</sup> difference in gender proportion  $\leq 5\%$  = +; difference in gender proportion  $> 5\%$  = -; unclear = ? <sup>c</sup> adequate instruments to assess ADHD = +; inadequate instruments to assess ADHD = -; unclear = ?; <sup>d</sup> appropriate diagnostic interviews to assess AUD = +; diagnoses of AUD based on non-structured, clinical evaluations or clinical chart / databases review = -; unclear = ?; <sup>e</sup> ADHD assessment in euthymia or during mood episode remission = +; ADHD assessment without mood state restriction = -; unclear = ?.

b)

| <b>Study</b>              | <b>Age comparability</b><br>(Mean age in the two groups) | <b>Gender comparability</b><br>(% of males in the two groups) | <b>ADHD diagnosis</b>                                     | <b>AUD diagnosis</b>                                                                                     | <b>Mood phase</b>          |
|---------------------------|----------------------------------------------------------|---------------------------------------------------------------|-----------------------------------------------------------|----------------------------------------------------------------------------------------------------------|----------------------------|
| Jhanda et al., 2018       | BD + ADHD = 27.4<br>BD = 29.8                            | BD + ADHD = 83.3 %<br>BD = 68.1 %                             | MINI DSM-IV                                               | Unclear                                                                                                  | Euthymia /<br>in remission |
| Karaahmet et al., 2013    | BD + ADHD = 34.3<br>BD = 37.8                            | BD + ADHD = 67.6 %<br>BD = 44.6 %                             | SCID-I;<br>Turgay's Adult ADD/ADHD<br>Scale;<br>WURS      | Unclear                                                                                                  | Euthymia /<br>in remission |
| Koc and Kesebir, 2014     | BD + ADHD = 37.3<br>BD = 44.7                            | BD + ADHD = 46.7 %<br>BD = 35.7 %                             | Adult Attention Deficit and<br>Hyperactivity Rating Scale | Unclear                                                                                                  | Euthymia /<br>in remission |
| McIntyre et al., 2010     | BD + ADHD = 36.7<br>BD = 39.1                            | BD + ADHD = 38.7 %<br>BD = 32.6 %                             | ASRS-1.1;<br>MINI plus 5.0.0;<br>WURS-25                  | MINI plus 5.0.0                                                                                          | Unclear                    |
| Nierenberg et al., 2005   | BD + ADHD = 37.8<br>BD = 40.9                            | BD + ADHD = 64.4 %<br>BD = 39.2 %                             | MINI 4.4                                                  | MINI 4.4                                                                                                 | No mood restrictions       |
| Pattanshetty et al., 2016 | N/R                                                      | N/R                                                           | ASRS-1.1;<br>ASRS-1.1 Symptom Checklist                   | diagnoses based on non-<br>structured, clinical<br>evaluations or clinical chart /<br>databases re-view. | Euthymia /<br>in remission |
| Perroud et al., 2014      | BD + ADHD = 37.2<br>BD = 43.2                            | BD + ADHD = 44.4 %<br>BD = 41.2 %                             | ASRS-1.1 Symptom Checklist;<br>DIVA                       | MINI                                                                                                     | No mood restrictions       |
| Perugi et al., 2013       | BD + ADHD = 38.5<br>BD = 43.2                            | BD + ADHD = 63.2 %<br>BD = 58.4 %                             | ASRS-1.1                                                  | DSM-IV-TR diagnostic<br>criteria                                                                         | No mood restrictions       |
| Pinna et al., 2019        | BD + ADHD = 39.9<br>BD = 47.9                            | BD + ADHD = 65.9 %<br>BD = 38.3 %                             | ASRS-1.1;<br>DSM-IV-TR criteria                           | diagnoses based on non-<br>structured, clinical<br>evaluations or clinical chart /<br>databases re-view. | Unclear                    |
| Tamam et al., 2008        | BD + ADHD = 33.8<br>BD = 33.8                            | BD + ADHD = 51.2 %<br>BD = 50 %                               | K-SADS-PL;<br>SCID;<br>WURS-25                            | SCID-I                                                                                                   | Euthymia /<br>in remission |
| Torres et al., 2015       | BD + ADHD = 39<br>BD = 43.6                              | BD + ADHD = 58.6 %<br>BD = 42.5 %                             | ASRS-1.1;<br>CAADID;<br>WURS                              | SCID-I                                                                                                   | Euthymia /<br>in remission |

ADHD = Attention Deficit Hyperactivity Disorder; AUD = Alcohol Use Disorder; ASRS-1.1 = Adult Attention Deficit and Hyperactivity Self-Report Scale, version 1.1; CAADID = Conners' Adult ADHD Diagnostic Interview for DSM-IV; DIVA = Diagnostic Interview for ADHD in adults; DSM-IV = Diagnostic and Statistical Manual of Mental Disorders, fourth edition; DSM-IV-TR = Diagnostic and Statistical Manual of Mental Disorders, fourth edition, Text Revision; K-SADS-PL = Kiddie Schedule of Affective Disorders and Schizophrenia - Present/Lifetime; MINI = Mini International Neuropsychiatric Interview; MINI 4.4 = Mini International Neuropsychiatric Interview plus, version 4.4; MINI plus 5.0.0 = Mini International Neuropsychiatric Interview plus, version 5.0.0; N/R = Not Rated; SCID = Structured Clinical Interview; SCID-I = Structured Clinical Interview Axis I Disorders; Turgay's Adult ADD/ADHD Scale = Turgay's Turkish version of Adult ADD/ADHD DSM IV-Based Diagnostic Screening and Rating Scale; WURS = Wender Utah Rating Scale; WURS-25 = Wender Utah Rating Scale - 25-item version.
